# Supplementary material for: A novel MARV glycoprotein-specific antibody with potentials of broad-spectrum neutralization to filovirus
Source: eLife journal article supplement (doi:10.7554/elife.91181), 2023-11-30
Supplement: fig1-data1 [file Figure 1B,1C.xlsx]

## Sheet: Sheet1
Figure 1B	AF-03 binding to MARV GP.
	AF-03 (μg/ml)	OD450
	20	2.0105	2.0026
	10	2.3513	2.3783
	5	2.2405	1.9934
	2.5	2.1536	2.3375
	1.25	1.8229	1.7382
	0.625	1.8261	1.9696
	0.3125	1.5158	1.4911
	0.15625	1.1514	1.1374
	0.078125	0.7385	0.8109
	0.0390625	0.5071	0.5548
	0.0195312	0.3446	0.3371
	0.00976562	0.2489	0.2483
	0.00488281	0.1338	0.1456
	0.00244141	0.1023	0.1122
Figure 1C	The binding kinetics of AF-03 to MARV GP is detected by SPR assay.
	AF-03 (M)	Response(RU)
	2.0346e-12	0.24975
	8.138e-12	0.714184
	1.627e-11	0.711236
	3.25e-11	0.996289
	6.51e-11	1.22222
	1.30214e-10	1.40676
	2.60428e-10	1.7931
