# Supplementary material for: A novel MARV glycoprotein-specific antibody with potentials of broad-spectrum neutralization to filovirus
Source: eLife journal article supplement (doi:10.7554/elife.91181), 2023-11-30
Supplement: fig1-figsupp1-data1 [file Figure 1-figure supplement 1B.xlsx]

## Sheet: Sheet1
Figure 1-figure supplement 1B	The binding kinetics of AF-03 Fab to MARV GP is detected by SPR assay.
	AF-03 Fab (M)	Response(RU)
	2.0346e-12	30.8902
	8.1384e-12	46.7808
	1.62769e-11	53.5054
	3.25537e-11	60.6139
	6.51074e-11	64.1181
	1.30215e-10	74.1087
	2.60429e-10	82.0383
