# Supplementary material for: A novel MARV glycoprotein-specific antibody with potentials of broad-spectrum neutralization to filovirus
Source: eLife journal article supplement (doi:10.7554/elife.91181), 2023-11-30
Supplement: fig2-data1 [file Figure 2A,2B,2D.xlsx]

## Sheet: Sheet1
Figure 2A	Relative luciferase Unit (RLU) and inhibition of MARV and mutants pseudovirus neutralized by AF-03.
	Mutation AF-03 (μg/ml) RLU		MARV		Q128S-N129S		T204A-Q205A-T206A		Y218A		K222A		C226Y
	20		3133.2	2343.06	400000	351700	30381.1	1800	1429.2	31694.8	393.3	240.2	148754	260920
	6.66667		10817	11541.7	678700	623400	140691	149400	171266	89267	3539.7	31946.6	297782	356274
	2.22222		82283.8	138761	709100	890000	396586	510000	457344	525973	289731	438966	556038	716700
	0.740741		252223	237777	757500	1016000	679395	507200	802258	591168	569761	473434	619960	621464
	0.246914		307874	415416	883346	744200	1.09943e+06	969400	1115967	882038	618399	545494	592630	638068
	0.082305		504296	570578	825971	853698	1298843	1401800	1581648	1.18414e+06	620496	693337	890412	906934
	0.027435		647603	619262	899700	886050	1.56616e+06	1424600	1.71051e+06	1.37291e+06	790402	754828	683881	853920
	0.009145		645215	754552	980900	958977	1.66403e+06	1518600	1.95991e+06	1.49728e+06	998720	890061	667557	797822
	0.003048		702359	763664	1076530	952160	1932972	1723400	2.05114e+06	1.87982e+06	1.15289e+06	1096513	830526	948681
	0		746000	867800	1183000	1082000	2039000	2000000	2382000	2006000	1311000	1201000	917100	1186000
	Mutation AF-03 (μg/ml) Inhibitor		MARV		Q128S-N129S		T204A-Q205A-T206A		Y218A		K222A		C226Y
	20		0.9958	0.9973	0.661877	0.674954	0.9851	0.9991	0.9994	0.9842	0.9997	0.9998	0.8378	0.78
	6.66667		0.9855	0.9867	0.426289	0.423845	0.931	0.9253	0.9281	0.9555	0.9973	0.9734	0.6753	0.6996
	2.22222		0.8897	0.8401	0.400592	0.177449	0.8055	0.745	0.808	0.7378	0.779	0.6345	0.3937	0.3957
	0.740741		0.6619	0.726	0.359679	0.0609982	0.6668	0.7464	0.6632	0.7053	0.5654	0.6058	0.324	0.476
	0.246914		0.5873	0.5213	0.2533	0.3122	0.4608	0.5153	0.5315	0.5603	0.5283	0.5458	0.3538	0.462
	0.082305		0.324	0.3425	0.3018	0.211	0.363	0.2991	0.336	0.4097	0.5267	0.4227	0.0291	0.2353
	0.027435		0.1319	0.2864	0.239476	0.1811	0.2319	0.2877	0.2819	0.3156	0.3971	0.3715	0.2543	0.28
	0.009145		0.1351	0.1305	0.170837	0.1137	0.1839	0.2407	0.1772	0.2536	0.2382	0.2589	0.2721	0.3273
	0.003048		0.0585	0.12	0.09	0.12	0.052	0.1383	0.1389	0.0629	0.1206	0.087	0.0944	0.2001
	RLU and inhibition of MARV and mutants pseudovirus neutralized by MR78.
	Mutation MR78 (μg/ml) RLU		MARV			Q128S-N129S			T204A-Q205A-T206A			Y218A			K222A			C226Y
	20		15860	9752	2455	32650	69290	89020	17570	9413	12270	3280	8301	12640	62470	57720	72510	241000	291200	304800
	6.66667		42420	67090	59800	193100	287600	287400	52500	81610	91370	78400	57730	72750	226100	250300	322100	734400	1166000	686000
	2.22222		191500	212900	197600	589700	570000	685200	174000	257700	266600	233900	205500	190800	810300	605700	643900	1027000	1232000	1283000
	0.740741		754400	701100	584700	1188000	1174000	1318000	656300	865300	894000	712900	685600	629400	2691000	2272000	1992000	3035000	2871000	2692000
	0.246914		980800	784100	727300	1264000	1437000	1357000	1098000	1114000	1311000	1469000	1086000	1002000	3146000	3679000	3311000	3847000	3818000	3662000
	0.082305		1086000	954300	880400	1274000	1583000	1593000	1638000	1319000	1350000	1547000	1094000	1007000	4517000	4286000	4466000	4347000	4239000	4159000
	0.027435		1156000	998700	873300	1709000	1658000	1907000	1820000	1841000	1967000	2382000	2161000	1656000	6356000	6046000	5777000	5580000	5228000	4328000
	0.009145		1125000	960300	958700	1701000	1826000	1718000	2201000	1993000	2177000	2711000	2315000	1980000	7021000	6064000	5789000	4962000	5438000	5234000
	0.003048		1279000	1001000	984700	1847000	1711000	1686000	2045000	2188000	1926000	1921000	1481000	1468000	7702000	7410000	6363000	5376000	6179000	6465000
	0		1336000	1110000	1027000	2088000	1725000	1647000	2160000	2071000	1853000	2292000	1957000	1760000	7160000	7354000	7648000	5726000	5754000	5522000
	Mutation MR78 (μg/ml) Inhibitor		MARV			Q128S-N129S			T204A-Q205A-T206A			Y218A			K222A			C226Y
	20		0.988129	0.991214	0.99761	0.984363	0.959832	0.94595	0.991866	0.995455	0.993378	0.998569	0.995758	0.992818	0.991275	0.992151	0.990519	0.957911	0.949392	0.944803
	6.66667		0.968249	0.939559	0.941772	0.907519	0.833275	0.825501	0.975694	0.960594	0.950691	0.965794	0.970501	0.958665	0.968422	0.965964	0.957884	0.871743	0.797358	0.87577
	2.22222		0.856662	0.808198	0.807595	0.717577	0.669565	0.583971	0.919444	0.875567	0.856125	0.897949	0.894992	0.891591	0.88683	0.917637	0.915808	0.820643	0.785888	0.767657
	0.740741		0.435329	0.368378	0.430672	0.431034	0.31942	0.199757	0.696157	0.582183	0.517539	0.688962	0.649668	0.642386	0.624162	0.691052	0.73954	0.469962	0.501043	0.512495
	0.246914		0.265868	0.3936	0.291821	0.394636	0.166957	0.176078	0.491667	0.462096	0.292499	0.359075	0.445069	0.430682	0.560615	0.499728	0.567076	0.328152	0.336462	0.336834
	0.082305		0.187126	0.2427	0.142746	0.389847	0.0823188	0.0327869	0.241667	0.36311	0.271452	0.325044	0.440981	0.427841	0.369134	0.417188	0.416056	0.240831	0.263295	0.246831
	0.027435		0.134731	0.10027	0.149659	0.181513	0.0388406	-0.157863	0.157407	0.111057	-0.0615219	-0.039267	-0.104241	0.0590909	0.112291	0.177862	0.244639	0.0254977	0.0914147	0.216226
	0.009145		0.157934	0.134865	0.0665044	0.185345	-0.0585507	-0.0431087	-0.0189815	0.037663	-0.174852	-0.18281	-0.182933	-0.125	0.0194134	0.175415	0.24307	0.133426	0.0549183	0.052155
	0.003048		0.0426647	0.0981982	0.0411879	0.115421	0.00811594	-0.0236794	0.0532407	-0.0564944	-0.0393956	0.161867	0.243229	0.165909	-0.0756983	-0.0076149	0.168018	0.0611247	-0.0738617	-0.170771
Figure 2B	AF-03 and MR78 binding to MARV GP and mutants.
	Mutation AF-03 (μg/ml) OD450		MARV		Q128S-N129S		C226Y
	2		0.152	0.152	0.067	0.066	0.157	0.114
	0.2		0.791	0.83	0.176	0.197	0.776	0.788
	0.02		2.322	2.458	0.233	0.178	1.069	1.23
	Mutation MR78 (μg/ml) OD450		MARV		Q128S-N129S		C226Y
	2		0.167	0.163	0.111	0.124	0.186	0.195
	0.2		0.769	0.797	0.458	0.459	0.794	0.818
	0.02		2.4	2.46	1.888	1.826	2.22	2.421
Figure 2C source data in supplementary table.
Figure 2D	Competitive epitopes for MR78 and AF03
	Ab biotin AF-03 (μg/ml) OD450			MR78		Ctrl mAb
	200			0.1388	0.1574	2.77	2.8555
	66.6667			0.3938	0.536	2.5958	2.4687
	22.2222			1.0837	1.1242	2.5508	2.697
	7.40741			2.0147	2.0211	2.7637	2.7537
	2.46914			2.8716	2.7344	2.8158	2.8251
	0.823045			2.9551	2.7569	2.8319	2.6405
	0.274348			2.618	2.55	2.2453	2.5406
