# Supplementary material for: A novel MARV glycoprotein-specific antibody with potentials of broad-spectrum neutralization to filovirus
Source: eLife journal article supplement (doi:10.7554/elife.91181), 2023-11-30
Supplement: fig3-data1 [file Figure 3A,3B,3D.xlsx]

## Sheet: Sheet1
Figure 3A	RLU and inhibition of pseudotypic MARV neutralized by AF-03 in HEK293T cells.
	Ab con. (μg/ml) RLU		AF-03		MR78		Ctrl mAb
	20		314	429	878	1524	411300	427700
	6.66667		1379	861	3558	5858	476400	493200
	2.22222		7058	9140	41220	37650	437900	536800
	0.740741		46330	70480	145700	179700	435100	495950
	0.246914		119200	122900	294200	371700	477100	495800
	0.082305		202900	235500	405700	428300	438400	460300
	0.027435		261100	271200	522100	538700	504500	511600
	0.009145		307400	305100	506700	533600	437000	461300
	0.003048		342400	350300	382100	442900	473800	468300
	0		416000	402600	628100	728400	483800	493300
	Ab con. (μg/ml) Inhibition		AF-03		MR78		Ctrl mAb
	20		0.999245	0.998934	0.998602	0.997908	0.149855	0.132982
	6.66667		0.996685	0.997861	0.994335	0.991958	0.0152956	0.000202716
	2.22222		0.983034	0.977298	0.934374	0.948311	0.0948739	-0.0881816
	0.740741		0.88863	0.824938	0.768031	0.753295	0.100661	-0.00537198
	0.246914		0.713462	0.694734	0.531603	0.489703	0.0138487	-0.00506791
	0.082305		0.51226	0.415052	0.354084	0.411999	0.0938404	0.0668964
	0.027435		0.372356	0.326379	0.168763	0.260434	-0.0427863	-0.0370971
	0.009145		0.261058	0.242176	0.193281	0.267435	0.0967342	0.0648692
	0.003048		0.176923	0.129906	0.391657	0.391955	0.0206697	0.0506791
	RLU and inhibition of pseudotypic MARV neutralized by AF-03 in Huh7 cells.
	Ab con. (μg/ml) RLU		AF-03		MR78		Ctrl mAb
	20		5814	16020	2233	2918	149700	117300
	6.66667		25940	42600	15970	11250	123200	129800
	2.22222		128600	138700	40690	50130	143800	130500
	0.740741		242500	244000	98430	121100	152600	146600
	0.246914		336400	394200	141400	145500	134990	115280
	0.082305		381100	513900	144800	182700	113000	108200
	0.027435		534200	539800	161400	182700	131170	104000
	0.009145		498300	723700	157600	164200	150900	132600
	0.003048		612400	655600	216500	219200	140800	133600
	0		640100	825100	203200	220700	126200	121400
	Ab con. (μg/ml) Inhibition		AF-03		MR78		Ctrl mAb
	20		0.990917	0.980584	0.989011	0.986778	-0.186212	0.0337727
	6.66667		0.959475	0.94837	0.921407	0.949026	0.0237718	-0.0691928
	2.22222		0.799094	0.831899	0.799754	0.772859	-0.139461	-0.0749588
	0.740741		0.621153	0.704278	0.5156	0.451291	-0.209192	-0.207578
	0.246914		0.474457	0.52224	0.304134	0.340734	-0.0696513	0.0504119
	0.082305		0.404624	0.377166	0.287402	0.172179	0.104596	0.108731
	0.027435		0.165443	0.345776	0.205709	0.172179	-0.0393819	0.143328
	0.009145		0.221528	0.122894	0.224409	0.256004	-0.195721	-0.092257
	0.003048		0.0432745	0.20543	-0.0654528	0.00679656	-0.115689	-0.100494
Figure 3B	RLU and inhibition of pseudotypic Angola, Musoke and Ravn strain neutralized by AF-03 in HEK293T cells.
	Stain AF-03 (μg/ml) RLU		Angola			Musoke			Ravn
	5		7016.24	3558.1	7717.2	75.128	255.502	119.496	20217.6	3237.96	1651.6
	1		35597.1	20212.4	25793.8	9325.26	7203.51	6397.63	71625.6	25609.3	28779.1
	0.2	0.2	52901.9	66393	71900.8	37892.7	20028.1	22566.4	175219	121914	140716
	0.04		95942.7	88309.6	92684.9	51368.8	40023.2	38532.9	195653	254474	237748
	0.008		130803	93243.1	94267.6	67549.5	47045.3	49820.6	324734	432317	232050
	0.0016		83516.8	81866.2	111795	91590.4	78191.9	68581.5	316138	428735	208556
	0.00032		96384.9	141950	91730	85026.1	51421.8	62560.8	292162	267573	432017
	0		93910	82420	91920	93910	82420	91920	432000	490600	412900
	Stain AF-03 (μg/ml) Inhibition		Angola			Musoke			Ravn
	5		0.9524	0.9762	0.941	0.9992	0.9969	0.9987	0.9532	0.9934	0.996
	1		0.7585	0.8648	0.8028	0.9007	0.9126	0.9304	0.8342	0.9478	0.9303
	0.2	0.2	0.6411	0.5559	0.4503	0.5965	0.757	0.7545	0.5944	0.7515	0.6592
	0.04		0.3491	0.4093	0.2914	0.453	0.5144	0.5808	0.5471	0.4813	0.4242
	0.008		0.1126	0.3763	0.2793	0.2807	0.4292	0.458	0.2483	0.1188	0.438
	0.0016		0.4334	0.4524	0.1453	0.0247	0.0513	0.2539	0.2682	0.1261	0.4949
	0.00032		0.3461	0.0505	0.2987	0.0946	0.3761	0.3194	0.3237	0.4546	-0.0463
Figure 3C	The bioluminescent signal of AF-03 prevents the entry of MARV pseudovirus into BALB/c mice.
Figure 3D	The total radiance value based on the luminescence of Figure 3C
	Group Total Flux		Mock	AF-03 10mg/kg	AF-03 3mg/kg	AF-03 1mg/kg	Ctrl mAb 10mg/kg
	Total Flux		1170000	232000	381000	747000	1800000
			921000	418000	547000	627000	3090000
			1690000	481000	431000	1240000	2890000
			2860000	328000	435000	816000	2730000
			1870000	425000	362000	686000	2790000
