# Supplementary material for: A novel MARV glycoprotein-specific antibody with potentials of broad-spectrum neutralization to filovirus
Source: eLife journal article supplement (doi:10.7554/elife.91181), 2023-11-30
Supplement: fig4-data1 [file Figure 4.xlsx]

## Sheet: Sheet1
Figure 4	RLU and inhibition of pseudotypic EBOV, SUDV and BDBV harboring cleaved GP neutralized by AF-03.
	Stain AF-03 (μg/ml) RLU		EBOV GPcl		EBOV
	0.4		1.42853e+06	1629220	1192212	1.25068e+06
	2		950876	1.01152e+06	1.26282e+06	1.39807e+06
	10		793134	817981	1.19735e+06	1.46455e+06
	0		2603000	2809000	1512000	1602000
	Stain AF-03 (μg/ml) Inhibition		EBOV GPcl		EBOV
	0.4		0.4512	0.42	0.2115	0.2193
	2		0.6347	0.6399	0.1648	0.1273
	10		0.6953	0.7088	0.2081	0.0858
	Stain AF-03 (μg/ml) RLU		SUDV GPcl			SUDV
	0.4		2608515	2.86169e+06	2178800	2.0159e+06	1494024	2.28852e+06
	2		1444373	1840725	1802775	1970024	1439088	1.84899e+06
	10		902776	1530171	606775	1.51552e+06	1417752	1.70046e+06
	0		3430000	3645000	3250000	2216000	1680000	2423000
	Stain AF-03 (μg/ml) Inhibition		SUDV GPcl			SUDV
	0.4		0.2395	0.2149	0.3296	0.0903	0.1107	0.0555
	2		0.5789	0.495	0.4453	0.111	0.1434	0.2369
	10		0.7368	0.5802	0.8133	0.3161	0.1561	0.2982
	Stain AF-03 (μg/ml) RLU		BDBV GPcl			BDBV
	0.4		454850	257134	366602	188922	256447	188018
	2		426555	283477	313908	172921	194361	239298
	10		135132	113520	130514	147799	186069	139866
	0		609800	340800	468800	230900	271000	256400
	Stain AF-03 (μg/ml) Inhibition		BDBV GPcl			BDBV
	0.4		0.2541	0.2455	0.218	0.1818	0.0537	0.2667
	2		0.3005	0.1682	0.3304	0.2511	0.2828	0.0667
	10		0.7784	0.6669	0.7216	0.3599	0.3134	0.4545
