# Supplementary material for: A novel MARV glycoprotein-specific antibody with potentials of broad-spectrum neutralization to filovirus
Source: eLife journal article supplement (doi:10.7554/elife.91181), 2023-11-30
Supplement: fig4-figsupp1-data1 [file Figure 4-figure supplement 1.xlsx]

## Sheet: Sheet1
Figure s1	Infection RLU of pseudotypic EBOV, SUDV and BDBV harboring cleaved GP in HEK293T.
	Stain RLU		EBOV		EBOV GPcl		SUDV		SUDV GPcl		BDBV		BDBV GPcl
			1600000	1230000	2810000	2550000	135000	175000	2100000	2390000	57200	65000	117000	94500
