# Supplementary material for: A novel MARV glycoprotein-specific antibody with potentials of broad-spectrum neutralization to filovirus
Source: eLife journal article supplement (doi:10.7554/elife.91181), 2023-11-30
Supplement: fig5-figsupp1-data1 [file Figure 5-figure supplement 1B.xlsx]

## Sheet: Sheet1
Figure s2B	AF03-NL and AF-03 binding to CIMPR 1-3 .
	Ab Con.(μg/ml) OD450		AF-03		AF03-NL
	20		0.1124	0.113	3.0645	3.0184
	5		0.1079	0.1007	2.129	2.1558
	1.25		0.0893	0.0867	0.8095	0.8672
	0.3125		0.0722	0.076	0.3331	0.3299
	0.078125		0.0632	0.0697	0.1479	0.1458
	0.019531		0.0597	0.0598	0.0827	0.0919
	0.004883		0.0658	0.0601	0.0639	0.0613
	0.001221		0.0627	0.0708	0.0573	0.0637
