# Supplementary material for: A novel MARV glycoprotein-specific antibody with potentials of broad-spectrum neutralization to filovirus
Source: eLife journal article supplement (doi:10.7554/elife.91181), 2023-11-30
Supplement: fig6-data1 [file Figure6A,6B.xlsx]

## Sheet: Sheet1
Figure 6A	RLU and inhibition of pseudotypic EBOV neutralized by AF03-NL and AF-03.
	Ab con. (μg/ml) RLU		AF-03			AF03-NL				Ab con. (μg/ml) Inhibition		AF-03			AF03-NL
	50		322500	316100	244800	11910	22490	7622		50		0.0669	0.0854	0.2917	0.971	0.9452	0.9814
	12.5		317800	311100	299300	34210	50980	29650		12.5		0.0805	0.0999	0.1341	0.9167	0.8758	0.9278
	3.125	0.2	380400	329400	316800	59700	65130	59470		3.125	0.2	-0.1006	0.047	0.0834	0.8546	0.8414	0.8552
	0.78125	1.2	420000	292500	315300	90550	112700	104000		0.78125	1.2	-0.2152	0.1537	0.0878	0.7795	0.7255	0.7467
	0.195312	2.2	419800	268700	310900	174600	207900	162800		0.195312	2.2	-0.2146	0.2226	0.1005	0.5747	0.4936	0.6035
	0.0488281	3.2	313600	320700	354000	290700	322800	316800		0.0488281	3.2	0.0927	0.0721	-0.0242	0.292	0.2138	0.2284
	0.012207	4.2	375200	297300	337300	413600	270900	327100		0.012207	4.2	-0.0855	0.1398	0.0241	-0.0074	0.3402	0.2033
	0.00305176	5.2	353900	361300	329000	351300	396300	368000		0.00305176	5.2	-0.0239	-0.0453	0.0481	0.1444	0.0347	0.1037
	0.000762939	6.2	338000	271500	315300	348400	366000	382400		0.000762939	6.2	0.0221	0.2145	0.0878	0.1514	0.1085	0.0686
	0		311600	363500	361800	428100	426800	376800
	RLU and inhibition of pseudotypic BDBV neutralized by AF03-NL and AF-03.
	Ab con. (μg/ml) RLU		AF-03			AF03-NL				Ab con. (μg/ml) Inhibition		AF-03			AF03-NL
	50		111000	106000	74300	26700	24400	21700		50		-0.14	-0.0876	0.2359	0.6954	0.7214	0.7526
	12.5		69100	92500	102000	28000	27600	22700		12.5		0.2889	0.0482	-0.0505	0.6802	0.6849	0.741
	3.125	0.2	98700	105000	87200	32900	46000	41700		3.125	0.2	-0.0154	-0.0834	0.1025	0.6245	0.4752	0.5241
	0.78125	1.2	84300	75400	96200	47100	56300	53200		0.78125	1.2	0.1326	0.2247	0.0098	0.4623	0.3576	0.393
	0.195312	2.2	101000	89600	89600	65400	86100	88000		0.195312	2.2	-0.0433	0.0785	0.0778	0.2529	0.0172	-0.0041
	0.0488281	3.2	82100	78100	80400	78300	81800	97300		0.0488281	3.2	0.1556	0.1967	0.1731	0.1059	0.0661	-0.1103
	0.012207	4.2	74600	83600	102000	83500	96400	73500		0.012207	4.2	0.2321	0.14	-0.0495	0.0467	-0.1002	0.1605
	0.00305176	5.2	90500	99200	78700	77000	94300	72100		0.00305176	5.2	0.0685	-0.0204	0.19	0.1204	-0.0771	0.1773
	0.000762939	6.2	101000	86300	98500	73000	82500	99600		0.000762939	6.2	-0.0413	0.1122	-0.013	0.1668	0.0577	-0.1372
	0		113000	89800	89100	89100	80600	93000
	RLU and inhibition of pseudotypic SUDV neutralized by AF03-NL and AF-03.
	Ab con. (μg/ml) RLU		AF-03			AF03-NL				Ab con. (μg/ml) Inhibition		AF-03			AF03-NL
	50		245000	248000	270000	4510	8200	2610		50		0.206	0.1956	0.1249	0.9581	0.9238	0.9757
	12.5		241000	311000	239000	10600	6500	4430		12.5		0.2203	-0.009	0.2241	0.9017	0.9396	0.9588
	3.125	0.2	343000	347000	267000	13700	15400	14700		3.125	0.2	-0.1134	-0.126	0.134	0.8723	0.8568	0.8635
	0.78125	1.2	345000	345000	293000	43000	34200	40300		0.78125	1.2	-0.1189	-0.1179	0.0504	0.6003	0.6818	0.6255
	0.195312	2.2	298000	381000	304000	97400	90100	79300		0.195312	2.2	0.0354	-0.2353	0.015	0.0944	0.1625	0.2627
	0.0488281	3.2	307000	314000	319000	107000	118000	133000		0.0488281	3.2	0.0037	-0.019	-0.0326	0.0093	-0.0967	-0.2388
	0.012207	4.2	255000	281000	349000	132000	87900	123000		0.012207	4.2	0.1723	0.0906	-0.1306	-0.2286	0.1834	-0.145
	0.00305176	5.2	393000	371000	292000	116000	115000	109000		0.00305176	5.2	-0.2748	-0.2016	0.0536	-0.0743	-0.0706	-0.0139
	0.000762939	6.2	336000	352000	413000	125000	109000	107000		0.000762939	6.2	-0.0907	-0.1409	-0.3381	-0.1589	-0.0093	0.0074
	0		300000	294000	332000	114000	105000	105000
	RLU and inhibition of pseudotypic TAVF neutralized by AF03-NL and AF-03.
	Ab con. (μg/ml) RLU		AF-03			AF03-NL				Ab con. (μg/ml) Inhibition		AF-03			AF03-NL
	50		277000	146000	208000	110000	79800	81300		50		-0.2678	0.329	0.0484	0.6641	0.7563	0.7517
	12.5		239000	179000	231000	202000	169000	128000		12.5		-0.095	0.1795	-0.0597	0.3842	0.4841	0.6076
	3.125	0.2	235000	218000	213000	205000	232000	214000		3.125	0.2	-0.0753	0.0021	0.0246	0.3738	0.2916	0.3475
	0.78125	1.2	186000	175000	197000	306000	312000	285000		0.78125	1.2	0.1479	0.1992	0.0989	0.0639	0.0452	0.1296
	0.195312	2.2	196000	147000	192000	259000	301000	351000		0.195312	2.2	0.0998	0.3271	0.1218	0.2078	0.0801	-0.0718
	0.0488281	3.2	185000	176000	193000	287000	329000	351000		0.0488281	3.2	0.1506	0.1928	0.1176	0.1244	-0.0043	-0.0733
	0.012207	4.2	144000	183000	199000	331000	311000	301000		0.012207	4.2	0.3395	0.1603	0.0901	-0.0101	0.0498	0.0807
	0.00305176	5.2	159000	165000	203000	339000	306000	299000		0.00305176	5.2	0.273	0.2428	0.0714	-0.0364	0.0651	0.0874
	0.000762939	6.2	178000	205000	178000	352000	330000	299000		0.000762939	6.2	0.1859	0.0585	0.1823	-0.0752	-0.0098	0.085
	0		203000	216000	236000	272000	337000	259000
	RLU and inhibition of pseudotypic RESTV neutralized by AF03-NL and AF-03.
	Ab con. (μg/ml) RLU		AF-03			AF03-NL				Ab con. (μg/ml) Inhibition		AF-03			AF03-NL
	50		205000	210000	209000	8630	10200	21100		50		-0.0895	-0.1129	-0.1107	0.9295	0.9171	0.7812
	12.5		179000	223000	166000	23000	31700	26800		12.5		0.0527	-0.1813	0.1169	0.8123	0.7412	0.5432
	3.125	0.2	213000	192000	187000	59700	35500	55900		3.125	0.2	-0.1298	-0.0184	0.006	0.5121	0.7097	0.1978
	0.78125	1.2	206000	229000	205000	81100	109000	98200		0.78125	1.2	-0.0943	-0.2137	-0.0863	0.3375	0.1136	0.1536
	0.195312	2.2	181000	256000	254000	129000	117000	104000		0.195312	2.2	0.041	-0.357	-0.3453	-0.0507	0.0417	-0.0842
	0.0488281	3.2	239000	205000	207000	125000	107000	133000		0.0488281	3.2	-0.2689	-0.0884	-0.0985	-0.0229	0.1234	0.0637
	0.012207	4.2	208000	189000	244000	139000	114000	115000		0.012207	4.2	-0.1049	-0.0004	-0.2959	-0.1389	0.0654	0.0923
	0.00305176	5.2	269000	254000	170000	123000	122000	111000		0.00305176	5.2	-0.4292	-0.3474	0.0999	-0.0016	0.0074	-0.1054
	0.000762939	6.2	217000	204000	246000	131000	121000	135000		0.000762939	6.2	-0.1532	-0.0847	-0.3076	-0.0694	0.0131	-0.0621
	0		180000	151000	234000	119000	118000	130000
	RLU and inhibition of pseudotypic BOMV neutralized by AF03-NL and AF-03.
	Ab con. (μg/ml) RLU		AF-03			AF03-NL				Ab con. (μg/ml) Inhibition		AF-03			AF03-NL
	50		82700	57400	61600	1210	52	1820		50		-0.3216	0.0824	0.0164	0.9854	0.9994	0.978
	12.5		68200	55300	64300	999	2580	3100		12.5		-0.0897	0.1161	-0.0279	0.9879	0.9689	0.9625
	3.125	0.2	44700	57400	71300	3810	3090	4680		3.125	0.2	0.2855	0.0832	-0.14	0.9539	0.9627	0.9435
	0.78125	1.2	40000	48300	62300	20700	12800	19300		0.78125	1.2	0.3614	0.2281	0.0044	0.7503	0.8459	0.7671
	0.195312	2.2	57000	48700	41400	42900	55300	50400		0.195312	2.2	0.0891	0.2214	0.3387	0.4816	0.3318	0.3909
	0.0488281	3.2	40600	45600	64400	70500	87500	103000		0.0488281	3.2	0.3518	0.2721	-0.0288	0.1482	-0.0571	-0.2401
	0.012207	4.2	46200	39800	59500	81900	90100	92500		0.012207	4.2	0.2611	0.3648	0.0496	0.0096	-0.0892	-0.1183
	0.00305176	5.2	42500	53300	57900	90100	85900	90600		0.00305176	5.2	0.3213	0.1476	0.0743	-0.0894	-0.0378	-0.0947
	0.000762939	6.2	56000	69500	55200	114000	105000	88000		0.000762939	6.2	0.1059	-0.1113	0.1179	-0.3731	-0.2691	-0.0641
	0		59400	62500	65800	95700	85200	67300
	RLU and inhibition of pseudotypic RAVN neutralized by AF03-NL and AF-03.
	Ab con. (μg/ml) RLU		AF-03			AF03-NL				Ab con. (μg/ml) Inhibition		AF-03			AF03-NL
	50		138000	114000	96300	2360	1720	1580		50		0.8201	0.8512	0.8747	0.9968	0.9977	0.9979
	12.5		341000	281000	325000	7920	5140	8880		12.5		0.5565	0.6341	0.5778	0.9894	0.9931	0.9881
	3.125	0.2	653000	490000	513000	11300	22700	21200		3.125	0.2	0.1508	0.363	0.3324	0.9848	0.9695	0.9715
	0.78125	1.2	814000	608000	612000	47400	73700	84400		0.78125	1.2	-0.0592	0.2097	0.2045	0.9363	0.901	0.8866
	0.195312	2.2	752000	675000	675000	257000	240000	288000		0.195312	2.2	0.0225	0.1218	0.1226	0.6543	0.678	0.6133
	0.0488281	3.2	767000	749000	670000	494000	523000	574000		0.0488281	3.2	0.0031	0.0257	0.1282	0.3359	0.2965	0.2289
	0.012207	4.2	717000	741000	696000	628000	642000	757000		0.012207	4.2	0.0669	0.036	0.0943	0.1554	0.1378	-0.0173
	0.00305176	5.2	780000	694000	737000	647000	701000	771000		0.00305176	5.2	-0.0147	0.0974	0.0418	0.1298	0.0577	-0.0356
	0.000762939	6.2	884000	693000	715000	784000	717000	905000		0.000762939	6.2	-0.1494	0.0982	0.0703	-0.0534	0.0367	-0.2167
	0		822000	752000	733000	643000	713000	877000
	RLU and inhibition of pseudotypic MLAV neutralized by AF03-NL and AF-03.
	Ab con. (μg/ml) RLU		AF-03			AF03-NL				Ab con. (μg/ml) Inhibition		AF-03			AF03-NL
	50		856000	631000	550000	254000	237000	249000		50		0.0887	0.3277	0.4138	0.9558	0.9587	0.9567
	12.5		753000	787000	853000	514000	442000	410000		12.5		0.1976	0.1615	0.0918	0.9104	0.923	0.9286
	3.125	0.2	897000	1000000	919000	730000	679000	771000		3.125	0.2	0.0445	-0.0653	0.0213	0.8727	0.8817	0.8656
	0.78125	1.2	898000	1010000	902000	1950000	1800000	1920000		0.78125	1.2	0.0437	-0.0738	0.0392	0.6597	0.6856	0.666
	0.195312	2.2	913000	1060000	832000	3520000	3360000	3590000		0.195312	2.2	0.0271	-0.1324	0.1141	0.3875	0.4145	0.3746
	0.0488281	3.2	852000	841000	1000000	4700000	4490000	4510000		0.0488281	3.2	0.0921	0.1041	-0.0685	0.1808	0.2183	0.2148
	0.012207	4.2	908000	909000	959000	5010000	4560000	4580000		0.012207	4.2	0.0325	0.0322	-0.0213	0.1268	0.2063	0.2021
	0.00305176	5.2	911000	815000	870000	4730000	4400000	4230000		0.00305176	5.2	0.0293	0.1315	0.0734	0.1756	0.2336	0.2632
	0.000762939	6.2	857000	869000	864000	4730000	4320000	4270000		0.000762939	6.2	0.0867	0.0746	0.0793	0.1754	0.2477	0.2556
	0		1030000	914000	870000	5870000	5990000	5360000
	RLU and inhibition of pseudotypic LLOV neutralized by AF-NL and AF-03.
	Ab con. (μg/ml) RLU		AF-03			AF03-NL				Ab con. (μg/ml) Inhibition		AF-03			AF03-NL
	50		7300000	6030000	5710000	1420000	1290000	1230000		50		-0.1124	0.0809	0.1304	0.733	0.7573	0.7682
	12.5		6040000	5320000	5580000	1710000	1450000	1180000		12.5		0.08	0.1895	0.1492	0.6794	0.7266	0.7774
	3.125	0.2	6170000	5120000	5950000	2360000	2120000	1940000		3.125	0.2	0.0605	0.2202	0.0942	0.5563	0.6018	0.6362
	0.78125	1.2	5810000	5320000	6320000	3800000	3230000	3010000		0.78125	1.2	0.1149	0.1894	0.0364	0.2861	0.3925	0.4341
	0.195312	2.2	5940000	4900000	5070000	4670000	4830000	3990000		0.195312	2.2	0.0943	0.2542	0.2276	0.1229	0.092	0.25
	0.0488281	3.2	5730000	5210000	5550000	6590000	5480000	4820000		0.0488281	3.2	0.1275	0.2069	0.1548	-0.2393	-0.0304	0.0943
	0.012207	4.2	5610000	5040000	6010000	5890000	5000000	4410000		0.012207	4.2	0.1451	0.2325	0.0846	-0.1082	0.0599	0.1704
	0.00305176	5.2	6430000	5360000	6820000	6970000	5430000	4780000		0.00305176	5.2	0.0209	0.1833	-0.0398	-0.3098	-0.0215	0.1007
	0.000762939	6.2	6860000	5530000	5920000	6820000	6530000	5550000		0.000762939	6.2	-0.0446	0.1579	0.0987	-0.2823	-0.2276	-0.0439
	0		6940000	6120000	6630000	5850000	4780000	3940000
Figure 6B	RLU and inhibition of pseudotypic EBOV mutations neutralized by AF03-NL.
	Mutation AF03 -NL(μg/ml) RLU		V75A		A82V		N107D		T206M		T230A		T240A		G286R		W291R		T270A
	0		1320000	1310000	672000	830000	1470000	1610000	1400000	1520000	1050000	1160000	1310000	1160000	906000	1020000	1610000	1700000	203000	246000
	0.4		1040000	1240000	578000	594000	1400000	1500000	1240000	1230000	796000	874000	876000	889000	860000	1050000	1660000	1650000	200000	178000
	2		544000	570000	239000	205000	510000	523000	490000	614000	436000	342000	350000	321000	468000	440000	670000	676000	85000	92700
	10		191000	216000	83200	84100	214000	205000	217000	188000	148000	183000	138000	112000	180000	206000	242000	297000	32700	39100
	50		112000	143000	31500	44800	122000	112000	107000	132000	105000	93200	88300	78000	112000	92000	155000	124000	19000	15500
	Mutation AF03 -NL(μg/ml) Inhibition		V75A		A82V		N107D		T206M		T230A		T240A		G286R		W291R		T270A
	0.4		0.2113	0.0575	0.2304	0.2094	0.0875	0.027	0.1474	0.1597	0.2793	0.2081	0.2903	0.2794	0.106	-0.0885	-0.0018	0.0048	0.1101	0.205
	2		0.5859	0.566	0.6822	0.7271	0.6686	0.6596	0.6639	0.579	0.6051	0.6899	0.7167	0.7395	0.5136	0.5431	0.5958	0.5923	0.6212	0.5871
	10		0.8547	0.8357	0.8892	0.888	0.861	0.8667	0.8513	0.8713	0.8663	0.834	0.8882	0.9096	0.8133	0.7863	0.8541	0.821	0.8542	0.8256
	50		0.9145	0.8911	0.9581	0.9403	0.9205	0.927	0.9268	0.9097	0.9052	0.9156	0.9285	0.9368	0.8836	0.9044	0.9067	0.9254	0.9156	0.9311
	Mutation AF03 -NL(μg/ml) RLU		P330L		K359E		I371V		G405E		A411T
	0		888000	812000	650000	566000	1040000	817000	457000	592000	543000	530000
	0.4		891000	879000	506000	535000	911000	894000	362000	375000	556000	457000
	2		393000	416000	275000	236000	431000	331000	153000	146000	190000	172000
	10		128000	143000	101000	104000	161000	148000	65900	62900	61100	66900
	50		93800	78200	49700	54200	70600	103000	25000	32600	49800	49000
	Mutation AF03 -NL(μg/ml) Inhibition		P330L		K359E		I371V		G405E		A411T
	0.4		-0.0492	-0.0344	0.1682	0.1205	0.0175	0.035	0.3092	0.2846	-0.0375	0.1481
	2		0.537	0.5107	0.5475	0.612	0.5345	0.6427	0.708	0.7213	0.646	0.6788
	10		0.8499	0.8319	0.8343	0.8282	0.8259	0.84	0.8743	0.88	0.886	0.8752
	50		0.8896	0.9079	0.9183	0.9108	0.9238	0.8888	0.9523	0.9377	0.9071	0.9085
	Mutation AF03 -NL(μg/ml) RLU		V503A		T544I		D552N
	0		315000	313000	1250000	1180000	718000	790000
	0.4		214000	251000	1060000	957000	487000	533000
	2		75200	99200	486000	531000	258000	230000
	10		36100	49000	251000	199000	71500	102000
	50		21600	34100	151000	136000	38000	61100
	Mutation AF03 -NL(μg/ml) Inhibition		V503A		T544I		D552N
	0.4		0.3176	0.2008	0.1299	0.2128	0.3538	0.2937
	2		0.7606	0.6844	0.6002	0.5632	0.6579	0.6944
	10		0.885	0.844	0.7939	0.836	0.9052	0.865
	50		0.9313	0.8913	0.8762	0.8879	0.9496	0.9189
	RLU and inhibition of pseudotypic EBOV mutations neutralized by AF03.
	Mutation AF03 (μg/ml) RLU		V75A		A82V		N107D		T206M		T230A		T240A		G286R		W291R		T270A
	0		1320000	1310000	672000	830000	1470000	1610000	1400000	1520000	1050000	1160000	1310000	1160000	906000	1020000	1610000	1700000	203000	246000
	0.4		1250000	1500000	963000	941000	1610000	1740000	1500000	1560000	1060000	1200000	1260000	1330000	1090000	941000	1560000	1770000	211000	242000
	0		6340000	6630000	2390000	2290000	6980000	7380000	10300000	8410000	5500000	6200000	3360000	3470000	5170000	5180000	11100000	11200000	85900	82200
	2		5330000	4950000	2390000	2270000	5320000	5860000	6050000	5790000	6110000	6330000	3070000	3450000	4370000	5180000	9800000	9730000	76200	91800
	10		5740000	5350000	2190000	2530000	5250000	4740000	5250000	5730000	6260000	5510000	2850000	3390000	4310000	4440000	10100000	9140000	73600	71200
	50		5720000	5210000	1710000	2210000	4160000	3590000	3730000	4540000	5980000	4980000	2280000	3210000	3800000	4250000	9610000	8930000	94700	98600
	Mutation AF03 (μg/ml) Inhibition		V75A		A82V		N107D		T206M		T230A		T240A		G286R		W291R		T270A
	0.4		0.0453	-0.1397	-0.2822	-0.2539	-0.0498	-0.1291	-0.0308	-0.0706	0.0399	-0.0833	-0.017	-0.0794	-0.1343	0.0217	0.0591	-0.0664	0.0606	-0.0771
	2		0.1783	0.2359	-0.0225	0.031	0.2583	0.1838	0.3532	0.3812	-0.0446	-0.0834	0.1007	-0.0102	0.1556	-0.0007	0.1178	0.1241	0.0933	-0.092
	10		0.1142	0.1754	0.0635	-0.0802	0.2686	0.3396	0.4384	0.3877	-0.0714	0.0579	0.1668	0.0082	0.1674	0.1417	0.0869	0.1767	0.1243	0.1525
	50		0.1176	0.197	0.2688	0.0558	0.42	0.4993	0.6006	0.515	-0.023	0.1477	0.3342	0.0603	0.2665	0.1798	0.1344	0.1961	-0.1264	-0.1732
	Mutation AF-03 (μg/ml) RLU		P330L		K359E		I371V		G405E		A411T
	0		888000	812000	650000	566000	1040000	817000	457000	592000	543000	530000
	0.4		899000	896000	569000	776000	929000	964000	496000	585000	438000	484000
	0		6750000	6860000	211000	189000	6720000	6830000	122000	124000	170000	160000
	2		4760000	5130000	231000	225000	5170000	6390000	165000	184000	163000	135000
	10		4850000	5190000	223000	197000	4420000	5700000	170000	152000	137000	129000
	50		3880000	4550000	187000	240000	4900000	5280000	150000	179000	137000	131000
	Mutation AF-03 (μg/ml) Inhibition		P330L		K359E		I371V		G405E		A411T
	0.4		-0.0585	-0.0543	0.0638	-0.2768	-0.0025	-0.0398	0.0536	-0.1165	0.1835	0.0974
	2		0.2996	0.2461	-0.1534	-0.1253	0.2363	0.057	-0.34901	-0.4913	0.013	0.1837
	10		0.2874	0.2362	-0.1178	0.0153	0.3472	0.158	-0.3832	-0.2369	0.171	0.22
	50		0.4295	0.3308	0.0668	-0.2029	0.2768	0.2207	-0.2223	-0.4579	0.1728	0.2054
	Mutation AF03 (μg/ml) RLU		V503A		T544I		D552N
	0		315000	313000	1250000	1180000	718000	790000
	0.4		320000	395000	1210000	1260000	856000	781000
	0		133000	135000	4360000	4610000	1500000	1530000
	2		138000	122000	4590000	4450000	1580000	1430000
	10		135000	137000	4640000	4100000	1290000	1290000
	50		133000	178000	3860000	3880000	1160000	1080000
	Mutation AF03 (μg/ml) Inhibition		V503A		T544I		D552N
	0.4		-0.0197	-0.2556	0.0033	-0.0354	-0.1356	-0.0359
	2		-0.0298507	0.0895522	-0.0236	0.0085	-0.0436	0.0575
	10		-0.0105	-0.027	-0.035	0.0865	0.1493	0.146
	50		0.0067	-0.3326	0.1402	0.1349	0.2351	0.286
