# Supplementary material for: A novel MARV glycoprotein-specific antibody with potentials of broad-spectrum neutralization to filovirus
Source: eLife journal article supplement (doi:10.7554/elife.91181), 2023-11-30
Supplement: fig6-figsupp1-data1 [file Figure 6-figure supplement 1A,B.xlsx]

## Sheet: Sheet1
Figure s4A	AF03-NL and AF-03 binding to MARV GP.
	Ab Con.(μg/ml)		AF-03		AF03-NL
	30		3.225	3.351	3.097	3.139
	10		3.213	3.253	2.585	2.587
	3.33333		3.147	3.055	2.134	2.012
	1.11111		2.877	2.854	1.157	1.127
	0.37037		1.901	2.28	0.517	0.518
	0.123457		1.368	1.52	0.269	0.213
	0.0411523		0.753	0.807	0.114	0.115
	0.0137174		0.477	0.458	0.088	0.082
	0.00457247		0.264	0.245	0.071	0.069
	0.00152416		0.138	0.167	0.071	0.064
Figure s4B	RLU and inhibition of pseudotypic MARV neutralized by AF03-NL and AF-03.
	Ab con. (μg/ml) RLU		AF03-NL			AF-03
	50		230	147	150	177	351	88
	12.5	12.5	289	500	1890	7690	3190	6190
	3.125	3.125	1550	6470	6210	21900	23100	29200
	0.78125	0.78125	13100	27400	39000	126000	136000	148000
	0.195312	0.195312	81600	112000	119000	237000	302000	298000
	0.0488281	0.0488281	227000	286000	280000	400000	427000	449000
	0.012207	0.012207	354000	374000	356000	473000	444000	459000
	0.00305176	0.00305176	433000	449000	408000	551000	500000	477000
	0.000762939	0.000762939	453000	508000	452000	480000	478000	455000
	0	0	531000	486000	418000	547000	533000	491000
	Ab con. (μg/ml) Inhibition		AF03-NL			AF-03
	50		0.9996	0.9992	0.9998	0.9995	0.9997	0.9997
	12.5	12.5	0.9832	0.993	0.9864	0.9994	0.999	0.996
	3.125	3.125	0.952	0.9494	0.9362	0.9968	0.9865	0.987
	0.78125	0.78125	0.724	0.7019	0.677	0.9727	0.9427	0.9185
	0.195312	0.195312	0.4818	0.3377	0.3467	0.8294	0.7651	0.7511
	0.0488281	0.0488281	0.1242	0.0659	0.0164	0.5266	0.4026	0.4143
	0.012207	0.012207	-0.0355	0.028	-0.0048	0.2597	0.2177	0.2551
	0.00305176	0.00305176	-0.2059	-0.0948	-0.044	0.0948	0.0617	0.1478
	0.000762939	0.000762939	-0.0506	-0.046	0.0033	0.0536	-0.0608	0.0561
