# Supplementary material for: A novel MARV glycoprotein-specific antibody with potentials of broad-spectrum neutralization to filovirus
Source: eLife journal article supplement (doi:10.7554/elife.91181), 2023-11-30
Supplement: fig7-data1 [file Figure 7B,7C and 7D right panel.xlsx]

## Sheet: Sheet1
Figure 7B	RLU and inhibition of pseudotypic EBOV neutralized by AF03-NL.
	Ab con. (nM) RLU		AF03-NL			NPC2			AF-03+NPC2 (Each with 300nM)			AF-03
	300		11910	22490	7622	232700	229000	202900	201300	203700	198700	322500	316100	244800
	100	100	34210	50980	29650	294700	265900	241800	226800	237700	271600	317800	311100	299300
	33.33	33.33	59700	65130	59470	321700	256500	245200	226300	197100	211000	380400	329400	316800
	11.11	11.11	90550	112700	104000	326300	282400	296600	283000	273000	276000	420000	292500	315300
	3.7	3.7	174600	207900	162800	370500	274100	328700	229000	282200	314500	419800	268700	310900
	1.23	1.23	290700	322800	316800	386300	279000	305300	283700	278400	322000	313600	320700	354000
	0.41	0.41	413600	270900	327100	278600	277000	303600	275900	268700	358000	375200	297300	337300
	0.14	0.14	351300	396300	368000	294900	285000	262100	288000	289300	261100	353900	361300	329000
	0.05	0.05	348400	366000	382400	363900	232900	271900	267700	272300	347900	338000	271500	315300
	0	0	428100	426800	376800	288900	323600	298800	324600	292700	327000	311600	363500	361800
	Ab con. (nM) Inhibition		AF03-NL			NPC2			AF-03+NPC2 (Each with 300nM)			AF-03
	300		0.971	0.9452	0.9814	0.234	0.2461	0.3321	0.3605	0.3529	0.3687	0.0669	0.0854	0.2917
	100	100	0.9167	0.8758	0.9278	0.0298	0.1247	0.204	0.2795	0.2448	0.1371	0.0805	0.0999	0.1341
	33.33	33.33	0.8546	0.8414	0.8552	-0.059	0.1556	0.1928	0.2811	0.3738	0.3297	-0.1006	0.047	0.0834
	11.11	11.11	0.7795	0.7255	0.7467	-0.0742	0.0703	0.0236	0.1009	0.1327	0.1232	-0.2152	0.1537	0.0878
	3.7	3.7	0.5747	0.4936	0.6035	-0.2197	0.0977	-0.0821	0.2725	0.1035	0.0008	-0.2146	0.2226	0.1005
	1.23	1.23	0.292	0.2138	0.2284	-0.2717	0.0815	-0.005	0.0987	0.1155	-0.023	0.0927	0.0721	-0.0242
	0.41	0.41	-0.0074	0.3402	0.2033	0.0828	0.0881	0.0005	0.1235	0.1464	-0.1374	-0.0855	0.1398	0.0241
	0.14	0.14	0.1444	0.0347	0.1037	0.0292	0.0618	0.1372	0.085	0.0809	0.1705	-0.0239	-0.0453	0.0481
	0.05	0.05	0.1514	0.1085	0.0686	-0.198	0.2333	0.1049	0.1495	0.1349	-0.1053	0.0221	0.2145	0.0878
Figure 7C	RLU and inhibition of pseudotypic EBOV neutralized by AF03-NL in siRNA-CI-MPR or negative control vector (NC) cells.
right panel	siRNA AF03-NL (μg/ml) RLU		si-CI-MPR		NC
	0		132000	133000	75500	77400
	0.8	100	100000	97000	50700	55300
	4	33.33	105000	115000	41700	29400
	20	11.11	131000	132000	117000	125000
	siRNA AF03-NL (μg/ml) Inhibition		si-CI-MPR		NC
	0.8		-0.38	-0.68	37.69	36.1
	4	100	24.05	26.4	58.12	54.33
	20	33.33	20.56	13.13	65.62	75.7
Figure 7D	RLU and inhibition of pseudotypic EBOV mutations neutralized by AF03-NL in CI-MPR or NC-knockin Huh7.
right panel	Huh7 AF03-NL (μg/ml) RLU		CI-MPR		NC
	0		1880000	1890000	1270000	971000
	2	100	1840000	1780000	8560560	680000
	10	33.33	1040000	947000	2963760	1100000
	50	11.11	731000	771000	828000	1160000
	Huh7 AF03-NL (μg/ml) Inhibition		CI-MPR		NC
	2	100	0.0238	0.0567	-0.0573	-0.1983
	10	33.33	0.4473	0.4979	-0.0133	-0.1293
	50	11.11	0.6126	0.5915	0.3502	0.2996
